# Supplementary material for: Favorable Impact of a Multidisciplinary Team Approach on Heart Transplantation Outcomes: A 14-Year Experience in a Mid-Volume Center
Source: Research Square preprint supplement (doi:10.21203/rs.3.rs-526489/v1), 2021-05-25
Supplement: Supplementary file 1 [file 91e6cd1364ce0a7a1e2d5810.docx]

**Supplementary Figure legends**

**Supplementary Figure S1.** Examples of the use of a secure online chat room provided by a social network service (KakaoTalk) with the 15 participating team members in the multidisciplinary team approach at our institution (dates and patient information were blinded, and an English translation is provided). (A) A cardiac intensivist (Yang, J. H.) and a cardiac surgeon (Cho, Y. H.) are discussing a patient under extracorporeal life support (ECLS) awaiting heart transplantation. (B) An ECLS coordinator is presenting a referral from another hospital.

**Supplementary Figure S2.** Kaplan–Meier post-heart transplantation survival curves for 1-year survival in patients who underwent heart transplantation with the multidisciplinary team approach (MDT group; green line) and without the multidisciplinary team approach (Non-MDT group; blue line).

MDT, multidisciplinary team.

**Supplementary Figure S3.** Kaplan–Meier post-heart transplantation survival curves for cardiac-related survival in patients who underwent heart transplantation with the multidisciplinary team approach (MDT group; green line) and without the multidisciplinary team approach (Non-MDT group; blue line).

MDT, multidisciplinary team.
